# Supplementary material for: IDH1 Promotes Foam Cell Formation by Aggravating Macrophage Ferroptosis
Source: MDPI journal article supplement (doi:10.3390/biology11101392), 2022-09-23
Supplement: s1 [file s1]

# Supplemental Data File for IDH1 promotes foam cell formation by aggravating macrophage ferroptosis

This file includes:

Supplementary Figure S1-2

**Supplementary Figure S1.** Oil red O staining and the levels of FTH1,  $\alpha$ -KG, NADPH and LDH

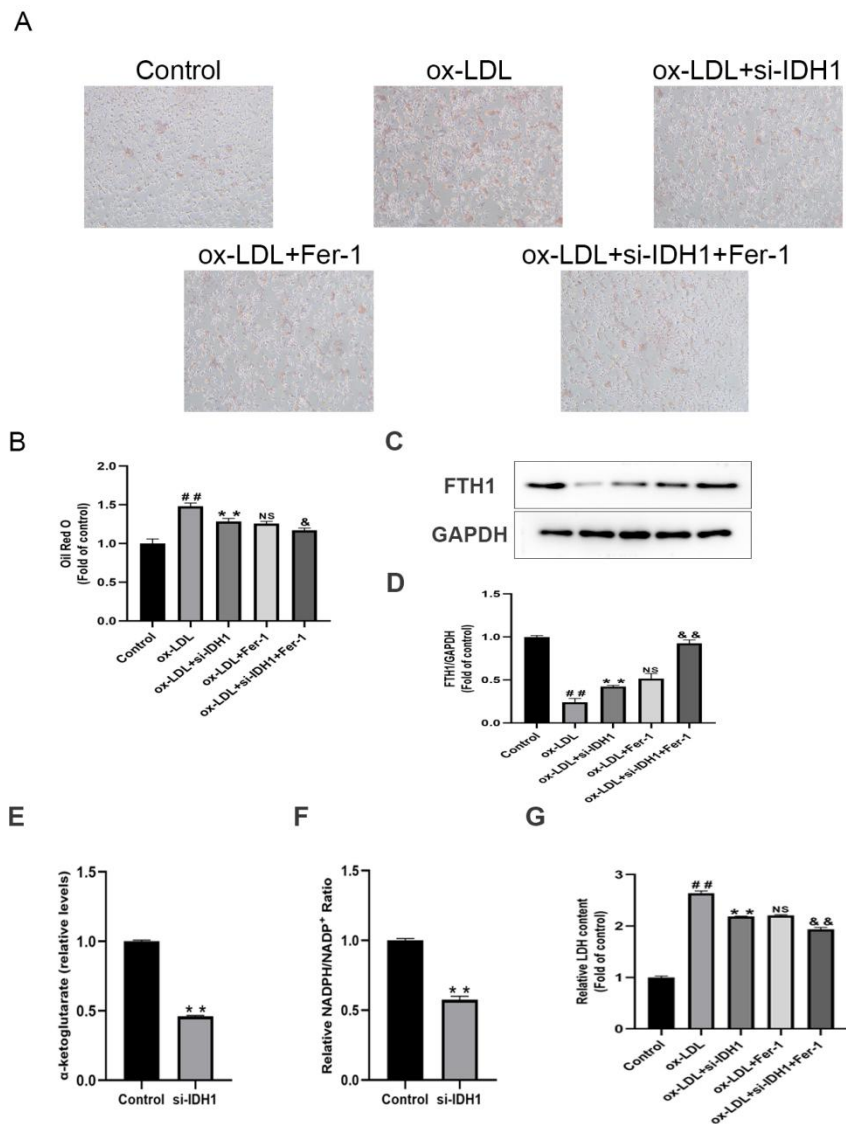

**Supplementary Figure S1 (A-B)** Oil red O staining. **(C-D)** Western blot was used to detect the levels of FTH1 protein expression. **(E)** The levels of  $\alpha$ -KG. **(F)** The levels of NADPH. **(G)** The levels of LDH. #P < 0.05, ##P < 0.01 vs. control group; \*P < 0.05,

**\*\*P < 0.01** vs. ox-LDL-treated group; NS vs. ox-LDL and si-IDH1 treatment group.  
**&P < 0.05**, **&&P < 0.01** vs. ox-LDL and Fer-1 treatment group. Data are presented as mean±SD.

**Supplementary Figure S2: Measurement of Lipid Peroxidation.**

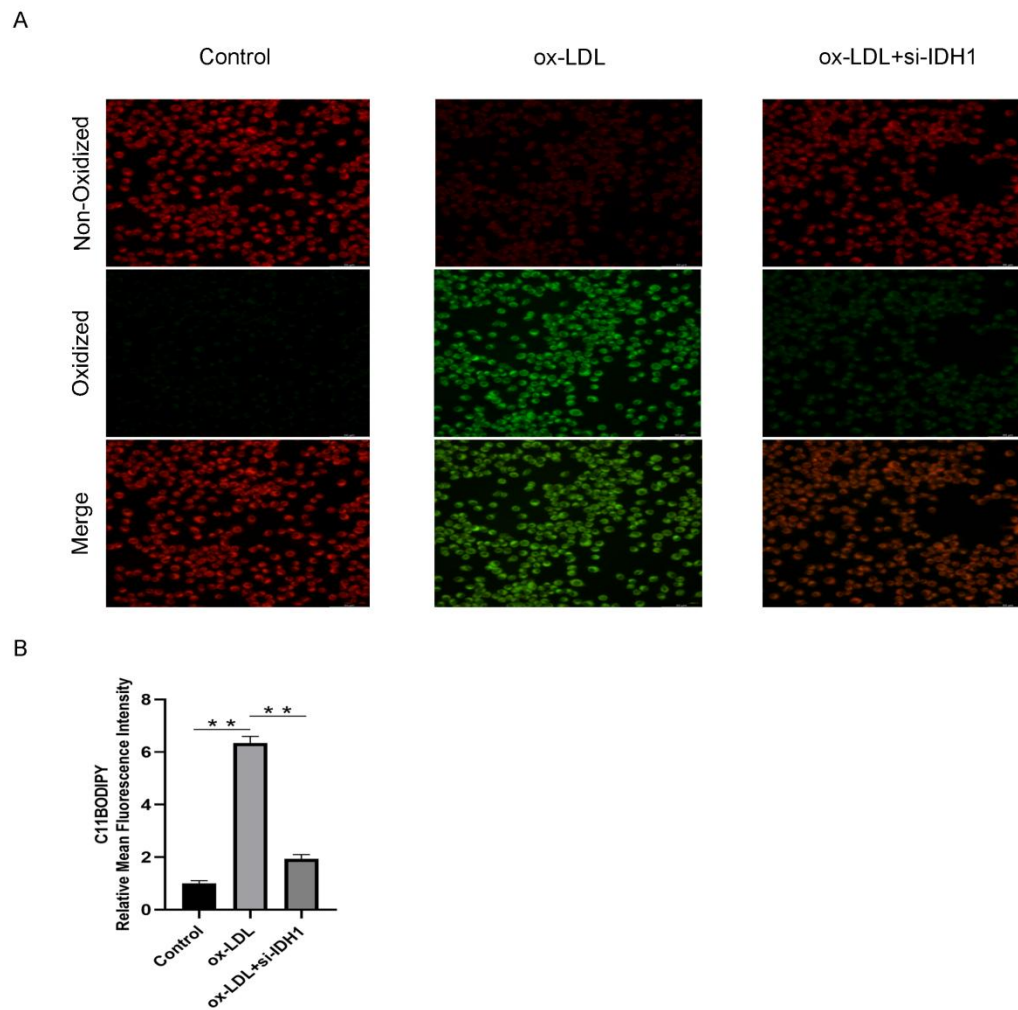

**Supplementary Figure S2 (A)** Representative images of C11BODIPY staining in different groups of cells. Scale bar=50µm. **(B)** The quantitative analysis of C11BODIPY relative mean fluorescence intensity. \*P<0.05; \*\*P < 0.01. Data are presented as mean ± SD.
